# Supplementary material
Source: Springer Nature journal article supplement (https://www.springermedizin.de/resource/supplementary/12958_2010_784_MOESM3_ESM.pdf/9568918)

# Effects of Equol and 5 $\alpha$ -DHT Alone and in Combination on PSA Secretion by LNCap Prostate Cancer Cells in Vitro

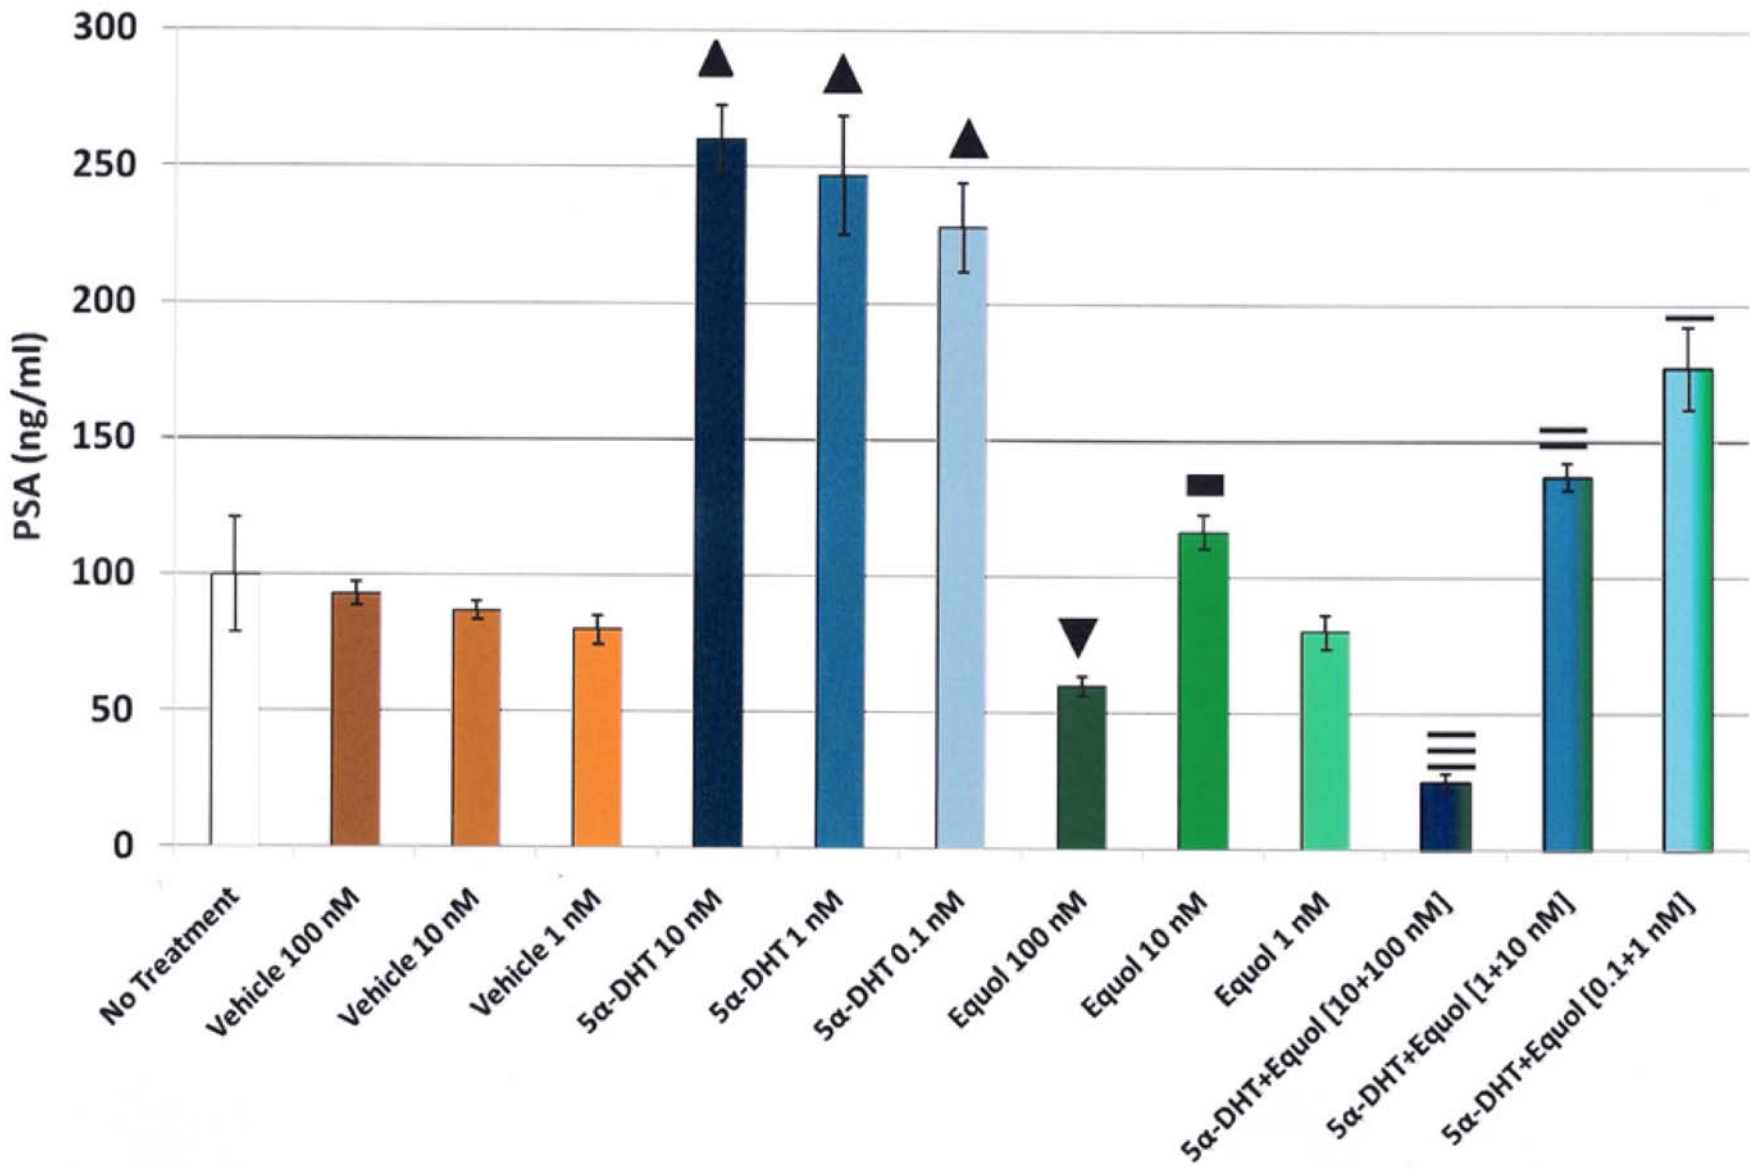

Supplement: MOESM3 [file 9568918]
